# Supplementary material for: Identification of a Four-Gene Signature Associated with the Prognosis Prediction of Lung Adenocarcinoma Based on Integrated Bioinformatics Analysis
Source: MDPI journal article supplement (doi:10.3390/genes13020238), 2022-01-27
Supplement: s1 [file s1]

## Supplemental tables

**Table S1.** The GO and KEGG pathways enrichment analysis base on turquoise module

| Category | Term                                     | Count | P Value   | Enrichment Ratio (%) | Genes                                                                                                   |
|----------|------------------------------------------|-------|-----------|----------------------|---------------------------------------------------------------------------------------------------------|
| GO_BP    | chitin catabolic process                 | 3     | 0.0080256 | 0.7672634            | CHIT1, CHIA, CHI3L2                                                                                     |
| GO_BP    | mitotic cytokinesis                      | 5     | 0.0026289 | 1.2787724            | ANLN, KIF4A, ANK3, CENPA, CEP55                                                                         |
| GO_BP    | response to cold                         | 5     | 0.0058358 | 1.2787724            | PLAC8, LPL, ADM, ADRB1, FOS                                                                             |
| GO_BP    | bicarbonate transport                    | 6     | 0.0018775 | 1.5345269            | CA2, HBB, SLC26A9, HBA1, SLC4A4, AQP1                                                                   |
| GO_BP    | epithelial cell differentiation          | 7     | 0.0029109 | 1.7902813            | MUC1, EHF, DMBT1, SPINK5, CDK1, TCF21, CES1                                                             |
| GO_BP    | response to toxic substance              | 7     | 0.0075510 | 1.7902813            | PON3, EPHX1, PENK, CDK1, FOS, INMT, CES1                                                                |
| GO_BP    | cellular response to hypoxia             | 8     | 0.0033517 | 2.0460358            | CCNB1, PMAIP1, STC1, NDNF, PTN, S100B, KCNK3, AQP1                                                      |
| GO_BP    | G1/S transition of mitotic cell cycle    | 8     | 0.0046874 | 2.0460358            | RRM2, CCNE2, CDKN2A, CDK1, ID4, MCM10, CDC6, CDKN3                                                      |
| GO_BP    | female pregnancy                         | 9     | 0.0004420 | 2.3017903            | CLIC5, MUC1, HPGD, SCGB1A1, FOSB, ADM, FOS, TFCP2L1, PTHLH                                              |
| GO_BP    | G2/M transition of mitotic cell cycle    | 10    | 0.0019069 | 2.5575448            | CCNB2, TPX2, CCNB1, MELK, CDK1, BIRC5, NEK2, HMMR, FOXM1, AURKA                                         |
| GO_BP    | extracellular matrix organization        | 11    | 0.0067388 | 2.8132992            | COL14A1, ABI3BP, COL4A4, COL4A3, SPINK5, NDNF, ICAM4, ITGB6, NPNT, CD44, SERPINB5                       |
| GO_BP    | response to drug                         | 14    | 0.0093022 | 3.5805627            | CPB2, GGH, LPL, AK4, PTN, FOS, AQP1, CCNB1, GAL, SCGB1A1, CDK1, FOSB, APOD, KCNK3                       |
| GO_BP    | receptor-mediated endocytosis            | 15    | 0.0000267 | 3.8363171            | SCARA5, SUSD2, SFTPD, HBB, TMPRSS2, LRP2, HBA1, PRSS12, MARCO, DMBT1, CD207, SCGB3A2, OLR1, CD36, FOLR1 |
| GO_BP    | positive regulation of apoptotic process | 15    | 0.0033265 | 3.8363171            | TOP2A, CDKN2A, ZBTB16, ADM, PTN, PNMA2, S100B, CLU, MLLT11, BMP2, MELK, GAL, CNR1, PMAIP1, ECT2         |

|       |                                                |    |           |           |                                                                                                                                                                 |
|-------|------------------------------------------------|----|-----------|-----------|-----------------------------------------------------------------------------------------------------------------------------------------------------------------|
| GO_BP | mitotic nuclear division                       | 17 | 0.0000478 | 4.3478261 | CDCA3, CDC6, NDC80, AURKA, CDC20, ASPM, ANLN, CCNB2, TPX2, NUF2, PBK, CDK1, BIRC5, NEK2, FAM83D, BUB1, CEP55                                                    |
| GO_BP | cell division                                  | 18 | 0.0008210 | 4.6035806 | CDCA3, UBE2C, CDCA7, CDC6, NDC80, AURKA, CDC20, CCNB2, TPX2, CCNB1, CCNE2, NUF2, CDK1, BIRC5, NEK2, FAM83D, BUB1, MAD2L1                                        |
| GO_BP | cell adhesion                                  | 22 | 0.0004610 | 5.6265985 | ROBO2, CX3CR1, EPHA4, SORBS2, ICAM4, SORBS1, AZGP1, PDZD2, CDH2, PCDHA1, COL4A3, HAS3, OLR1, ITGBL1, COL6A6, PGM5, ITGB6, CD36, CD44, FREM2, HABP2, EPHA3       |
| GO_BP | oxidation-reduction process                    | 22 | 0.0094370 | 5.6265985 | EGLN3, RRM2, STEAP4, HPGD, MAOA, HHIP, TYRP1, CYP4B1, PLOD2, HSD17B6, FMO3, ALOX15B, FMO5, C15ORF48, SDR16C5, DUOX1, CH25H, BMP2, CYP4X1, CYP2B6, HSD17B2, CRYM |
| GO_CC | condensed nuclear chromosome outer kinetochore | 3  | 0.0023245 | 0.7672634 | CCNB1, BUB1, NDC80                                                                                                                                              |
| GO_CC | multivesicular body lumen                      | 3  | 0.0078182 | 0.7672634 | SFTPB, NAPSA, SFTPC                                                                                                                                             |
| GO_CC | axonal growth cone                             | 4  | 0.0051605 | 1.0230179 | OLFM1, GPM6A, EPHA4, FLRT3                                                                                                                                      |
| GO_CC | lamellar body                                  | 5  | 0.0000103 | 1.2787724 | SFTA3, SFTPB, SFTPC, SFTPD, SFTPA1                                                                                                                              |
| GO_CC | clathrin-coated endocytic vesicle              | 5  | 0.0001790 | 1.2787724 | SFTA3, SFTPB, SFTPC, SFTPD, SFTPA1                                                                                                                              |
| GO_CC | intercalated disc                              | 6  | 0.0019609 | 1.5345269 | DSP, CDH2, PKP2, PGM5, ANK3, FGF13                                                                                                                              |
| GO_CC | brush border membrane                          | 6  | 0.0034205 | 1.5345269 | SLC34A2, TMEM27, CD36, LRP2, FOLR1, AQP1                                                                                                                        |
| GO_CC | organelle membrane                             | 8  | 0.0017795 | 2.0460358 | CYP2B6, CYP4X1, EPHX1, CYP4B1, FMO3, TFPI, CYP3A5, FMO5                                                                                                         |
| GO_CC | midbody                                        | 9  | 0.0044061 | 2.3017903 | ASPM, KIF4A, SLC2A1, CDK1, BIRC5, NEK2, ECT2, CEP55, AURKA                                                                                                      |
| GO_CC | ollagen trimer                                 | 11 | 0.0000150 | 2.8132992 | MARCO, FCN3, COL14A1, COL4A4, COL4A3, SFTPD, COL21A1, COL6A6, CD36, SFTPA1, GLDN                                                                                |
| GO_CC | basolateral plasma membrane                    | 14 | 0.0000694 | 3.5805627 | DSP, HPGD, CADM1, SLC2A1, AQP4, ANK3, AQP3, SLC4A4, AQP1, CDH2, CA2, SLCO4C1, LEPR, FOLR1                                                                       |

|       |                                       |    |            |            |                                                                                                                                                                                                                                                                                                                                                                                                                                                                                                 |
|-------|---------------------------------------|----|------------|------------|-------------------------------------------------------------------------------------------------------------------------------------------------------------------------------------------------------------------------------------------------------------------------------------------------------------------------------------------------------------------------------------------------------------------------------------------------------------------------------------------------|
| GO_CC | apical plasma membrane                | 15 | 0.0022567  | 3.8363171  | SLC34A2, SLC1A1, SLC2A1, STC1, SORBS2, LRP2, AQP1, DPP4, DUOX1, MUC1, CDH2, SCNN1B, SLC26A9, CD36, FOLR1                                                                                                                                                                                                                                                                                                                                                                                        |
| GO_CC | proteinaceous extracellular matrix    | 21 | 0.0000005  | 5.3708440  | SERPINA1, COL14A1, SFTPD, MAMDC2, NDNF, NPNT, GLDN, COCH, MMP12, FLRT3, COL4A4, MGP, COL4A3, OGN, MMP28, GPC3, COL21A1, ALPL, COL6A6, SFTPA1, PI3                                                                                                                                                                                                                                                                                                                                               |
| GO_CC | cell surface                          | 23 | 0.0013885  | 5.8823529  | ROBO2, LY6K, CPM, EPHA4, SLC46A2, SCARA5, PLA2G1B, HHIP, LPL, ANK3, PTN, HMMR, TFPI, CLU, DPP4, BMP2, APOH, KISS1R, FCER1A, SLC26A9, CD36, FOLR1, CD44                                                                                                                                                                                                                                                                                                                                          |
| GO_CC | endoplasmic reticulum                 | 28 | 0.0086796  | 7.1611253  | SERPINA1, ATP8A1, LRRK2, PLOD2, PTN, LRP2, HSD17B6, TFPI, CLU, CLGN, TMEM100, PDZD2, PCDHA1, AGR3, APOD, MAGEA3, EPHA4, MAMDC2, SPINK5, ELOVL6, ANK3, ZDHHC11, FOS, FMO5, OLFM1, COL4A3, OGN, ERP27                                                                                                                                                                                                                                                                                             |
| GO_CC | integral component of plasma membrane | 52 | 0.0000280  | 13.2992327 | PIGR, STEAP4, HHIP, SLC2A1, ICAM4, AQP4, SLC4A4, AQP3, AQP1, VSIG2, FCER1A, SLC16A7, OLR1, CD36, SLC16A4, ABCC3, SLC34A2, EPHA4, SLC15A2, SCARA5, GPRC5A, CEACAM6, SCNN1B, CD44, EPHA3, CX3CR1, SLC22A3, SLC1A1, TMPRSS2, CD1E, ADRB1, AGER, CD1A, MUC1, TSPAN8, PCDHA1, FLRT3, CNR1, TSPAN7, KISS1R, GPC3, HAS3, KCNMB4, CADM1, CAV2, KCNJ15, MARCO, SLCO4C1, ATP13A4, SLC26A9, FOLR1, KCNK3                                                                                                   |
| GO_CC | extracellular space                   | 65 | <0.0000001 | 16.6240409 | PIGR, CPM, ORM1, SERPINA1, C2ORF40, COL14A1, LRRK2, CXCL17, ADM, ICAM4, C4BPA, CLU, GLDN, WFDC2, DMBT1, CA2, SOSTDC1, CD36, TPSAB1, HABP2, CPA3, SFTPB, CHIA, SFTPC, SFTPD, GKN2, PGC, SERPINB5, CHIT1, OLFM1, AZGP1, RBP4, GAL, SLPI, CEACAM6, CHI3L2, HIST1H2BG, CES1, CCL14, PON3, CPB2, PLA2G1B, LPL, STC1, PTN, TFPI, PTHLH, SELENBP1, MUC1, FLRT3, ABI3BP, APOH, GPC3, APOD, NAPSA, SERPIND1, GDF15, GGH, S100B, BMP2, SCGB1A1, OGN, SCGB3A1, ALPL, SFTPA1                                |
| GO_CC | extracellular region                  | 70 | <0.0000001 | 17.9028133 | SFTA2, SFTA3, LY6K, ORM1, FCN3, TPSB2, SERPINA1, COL14A1, HHIP, CXCL17, HBB, ADM, ICAM4, C4BPA, CLU, CHRDL1, WFDC2, DMBT1, LEPR, TPSAB1, ENPP5, HABP2, CPA3, SFTPB, CHIA, PLA2G12B, SFTPC, IL1R2, SFTPD, SPINK5, HBA1, NPNT, CHIT1, MMP12, AZGP1, RBP4, GAL, COL4A4, COL4A3, SCG5, COL21A1, COL6A6, EPHA3, CCL14, PLA2G1B, LPL, NDNF, TFPI, AGER, MST1L, PTHLH, SCUBE2, PDZD2, PCDHA1, C7, WIF1, APOH, PENK, SUS4, APOD, SERPIND1, GDF15, S100B, BMP2, OGN, NMU, SCGB3A2, ITGBL1, SFTPA1, FGF13 |

|       |                                              |     |            |            |                                                                                                                                                                                                                                                                                                                                                                                                                                                                                                                                                                                                                                                                                                                                                                                                                           |
|-------|----------------------------------------------|-----|------------|------------|---------------------------------------------------------------------------------------------------------------------------------------------------------------------------------------------------------------------------------------------------------------------------------------------------------------------------------------------------------------------------------------------------------------------------------------------------------------------------------------------------------------------------------------------------------------------------------------------------------------------------------------------------------------------------------------------------------------------------------------------------------------------------------------------------------------------------|
| GO_CC | extracellular exosome                        | 101 | <0.0000001 | 25.8312021 | FCGBP, STEAP4, ATP8A1, CALML3, PLOD2, CLU, SLC4A4, AQP1, DMBT1, CDH2, PEBP4, SLC15A2, SPINK5, CYS1, NPNT, PGC, AZGP1, RBP4, C1ORF116, SLPI, SCNN1B, HIST1H2BG, FREM2, GPM6A, CPB2, SLC1A1, LPL, AK4, DPP4, TMEM27, TSPAN8, C7, APOH, MYH11, APOD, S100A14, PI3, ARSE, NAPSA, CADM1, GGH, ALOX15B, OGN, CDK1, SCGB3A1, ALPL, DYNLRB2, SLC26A9, ROBO2, CPM, CLIC5, PIGR, ORM1, CLIC3, SLC44A4, SERPINA1, COL14A1, LRRK2, SLC2A1, ADIRF, HBB, WFDC2, SULT1C2, CA2, OLR1, ITGB6, CTSE, DSP, HBA1, TMC5, SERPINB5, GPRC5A, CD44, PON3, HPGD, TMPRSS2, LRP2, COCH, PBLD, SELENBP1, SCEL, MUC1, GNG4, GPC3, CRYM, SERPIND1, GDF15, SUSD2, PTPN13, PDZK1IP1, TPPP3, FABP4, MLPH, PSAT1, MGP, SLCO4C1, SCGB1A1, PI15, C16ORF89, FOLR1, CAPS                                                                                        |
| GO_CC | plasma membrane                              | 111 | 0.0004210  | 28.3887468 | LY6K, SLC46A2, STEAP4, ATP8A1, ICAM4, AQP4, C4BPA, AQP3, SLC4A4, GLDN, AQP1, CDH2, LAMP3, MAGEA1, LEPR, SLC16A7, RGS8, ENPP5, SLC34A2, EPHA4, SLC15A2, PAQR5, IL1R2, CACNA2D2, ANK3, AZGP1, MELK, CT83, SCNN1B, MALL, PKP2, FREM2, EPHA3, GPM6A, SLC22A3, PARM1, RRAD, SLC1A1, IL20RB, LPL, CACNA1D, CD1E, ADRB1, HMMR, SLC1A7, AGER, CD1A, DPP4, PCDHA1, FLRT3, PENK, KCNMB4, S100A14, STXBP6, CADM1, SYT1, CAV2, ZBTB16, ABCA8, ALOX15B, MARCO, CD207, ALPL, SLC26A9, FGF13, DIRAS3, CPM, PIGR, SLC44A4, LRRK2, FHL1, SLC2A1, TMEM100, CA2, SIX2, OLR1, FCER1A, ITGB6, CD36, ABCC3, DSP, PRSS12, GPRC5A, CEACAM6, CLDN18, HLA-DQB2, CD44, HLA-DQB1, CX3CR1, TMPRSS2, LRP2, TFPI, DUOX1, GNG4, CNR1, KISS1R, GPC3, HAS3, SCN7A, PRAME, SUSD2, KCNJ15, SORBS1, PTPN13, VEPH1, SLCO4C1, ATP13A4, ACKR1, FOLR1, CAPS, KCNK3 |
| GO_MF | chitinase activity                           | 3   | 0.0075861  | 0.7672634  | CHIT1, CHIA, CHI3L2                                                                                                                                                                                                                                                                                                                                                                                                                                                                                                                                                                                                                                                                                                                                                                                                       |
| GO_MF | chitin binding                               | 3   | 0.0099840  | 0.7672634  | CHIT1, CHIA, CHI3L2                                                                                                                                                                                                                                                                                                                                                                                                                                                                                                                                                                                                                                                                                                                                                                                                       |
| GO_MF | endopeptidase inhibitor activity             | 5   | 0.0076894  | 1.2787724  | SERPIND1, SLPI, PI3, TFPI, WFDC2                                                                                                                                                                                                                                                                                                                                                                                                                                                                                                                                                                                                                                                                                                                                                                                          |
| GO_MF | scavenger receptor activity                  | 6   | 0.0024447  | 1.5345269  | MARCO, SCARA5, DMBT1, SUSD2, TMPRSS2, PRSS12                                                                                                                                                                                                                                                                                                                                                                                                                                                                                                                                                                                                                                                                                                                                                                              |
| GO_MF | serine-type endopeptidase inhibitor activity | 8   | 0.0030260  | 2.0460358  | SERPINA1, SERPIND1, SLPI, SPINK5, PI3, TFPI, SERPINB5, WFDC2                                                                                                                                                                                                                                                                                                                                                                                                                                                                                                                                                                                                                                                                                                                                                              |
| GO_MF | iron ion binding                             | 10  | 0.0033134  | 2.5575448  | CH25H, EGLN3, CYP2B6, CYP4X1, HBB, CYP4B1, PLOD2, HBA1, ALOX15B, CYP3A5                                                                                                                                                                                                                                                                                                                                                                                                                                                                                                                                                                                                                                                                                                                                                   |

|              |                                                 |    |           |           |                                                                    |
|--------------|-------------------------------------------------|----|-----------|-----------|--------------------------------------------------------------------|
| KEGG pathway | Arachidonic acid metabolism                     | 5  | 0.0417296 | 1.2787724 | HPGDS, CYP2B6, PLA2G12B, PLA2G1B, ALOX15B                          |
| KEGG pathway | Retinol metabolism                              | 5  | 0.0483930 | 1.2787724 | SDR16C5, CYP2B6, ADH1B, HSD17B6, CYP3A5                            |
| KEGG pathway | Arrhythmogenic right ventricular cardiomyopathy | 6  | 0.0142820 | 1.5345269 | DSP, CDH2, PKP2, CACNA2D2, CACNA1D, ITGB6                          |
| KEGG pathway | Drug metabolism - cytochrome P450               | 6  | 0.0151557 | 1.5345269 | CYP2B6, MAOA, ADH1B, FMO3, CYP3A5, FMO5                            |
| KEGG pathway | Complement and coagulation cascades             | 6  | 0.0160644 | 1.5345269 | CPB2, SERPINA1, C7, SERPIND1, C4BPA, TFPI                          |
| KEGG pathway | Pancreatic secretion                            | 6  | 0.0495551 | 1.5345269 | CPA3, CPB2, PLA2G12B, PLA2G1B, CA2, SLC4A4                         |
| KEGG pathway | Bile secretion                                  | 7  | 0.0035233 | 1.7902813 | ABCC3, CA2, EPHX1, SLC2A1, AQP4, SLC4A4, AQP1                      |
| KEGG pathway | ECM-receptor interaction                        | 7  | 0.0108365 | 1.7902813 | COL4A4, COL4A3, COL6A6, CD36, HMMR, ITGB6, CD44                    |
| KEGG pathway | p53 signaling pathway                           | 8  | 0.0005470 | 2.0460358 | CCNB2, CCNB1, RRM2, CCNE2, CDKN2A, CDK1, PMAIP1, SERPINB5          |
| KEGG pathway | Protein digestion and absorption                | 9  | 0.0005700 | 2.3017903 | DPP4, CPA3, CPB2, COL14A1, COL4A4, COL4A3, SLC1A1, COL21A1, COL6A6 |
| KEGG pathway | Oocyte meiosis                                  | 9  | 0.0025876 | 2.3017903 | CDC20, CCNB2, CCNB1, CCNE2, CDK1, CALML3, BUB1, MAD2L1, AURKA      |
| KEGG pathway | Cell cycle                                      | 10 | 0.0013415 | 2.5575448 | CDC20, CCNB2, CCNB1, CCNE2, CDKN2A, CDK1, TTK, CDC6, BUB1, MAD2L1  |

**Abbreviations:** GO, Gene Ontology; BP, biological process; CC, cellular component; MF, molecular function; KEGG, Kyoto Encyclopedia of Genes and Genomes.

**Table S2.** The GSEA results of hallmark and KEGG pathway enrichment analysis base on the cutoff of ROS (-2.71) in training dataset

| Term                                           | ES      | NES     | NP     | FDR    | FWER  |
|------------------------------------------------|---------|---------|--------|--------|-------|
| KEGG_CELL_CYCLE                                | -0.6837 | -1.7685 | <0.001 | 0.1324 | 0.23  |
| KEGG_DNA_REPLICATION                           | -0.8059 | -1.7643 | 0.002  | 0.0918 | 0.238 |
| KEGG_MISMATCH_REPAIR                           | -0.7823 | -1.8173 | 0.002  | 0.1509 | 0.161 |
| KEGG_ALDOSTERONE_REGULATED_SODIUM_REABSORPTION | 0.593   | 1.7217  | 0.004  | 0.6898 | 0.338 |
| KEGG_VASOPRESSIN_REGULATED_WATER_REABSORPTION  | 0.4817  | 1.6453  | 0.0075 | 0.7536 | 0.527 |
| HALLMARK_MITOTIC_SPINDLE                       | -0.6258 | -1.8448 | <0.001 | 0.0361 | 0.036 |
| HALLMARK_E2F_TARGETS                           | -0.803  | -1.722  | <0.001 | 0.0231 | 0.116 |
| HALLMARK_ADIPOGENESIS                          | 0.5147  | 1.8596  | 0.002  | 0.0341 | 0.039 |
| HALLMARK_G2M_CHECKPOINT                        | -0.7689 | -1.7498 | 0.0021 | 0.0254 | 0.092 |
| HALLMARK_BILE_ACID_METABOLISM                  | 0.508   | 1.6138  | 0.0059 | 0.1415 | 0.26  |
| HALLMARK_HEME_METABOLISM                       | 0.4046  | 1.6677  | 0.0062 | 0.1328 | 0.184 |
| HALLMARK_SPERMATOGENESIS                       | -0.5325 | -1.5803 | 0.0083 | 0.0638 | 0.299 |
| HALLMARK_MYC_TARGETS_V2                        | -0.6638 | -1.7698 | 0.0086 | 0.0287 | 0.081 |

**Abbreviations:** GSEA, Gene Set Enrichment Analysis; ES, enrichment score; NES, normalized enrichment score; NP, normalized P value; FDR, false discovery rate; FWER, family-wise error rate; KEGG, Kyoto encyclopedia of genes and genomes.
